# Supplementary material for: Enhancing the performance of ionic conductivity for solid-state electrolytes: an effective strategy of injecting lithium ions within anionic metal–organic frameworks
Source: Royal Society of Chemistry journal article supplement (doi:10.1039/d4cc04515g), 2024-01-01
Supplement: d4cc04515g1.pdf [file d4cc04515g1.pdf]

## **Electronic Supplementary Information**

### **Enhancing the Performance of Ionic Conductivity for Solid-state Electrolyte: An Effective Strategy of Injecting Lithium Ions within Anionic Metal–Organic Frameworks**

Lu Shi, Xin Wang and Zhiliang Liu\*

Inner Mongolia Key Laboratory of Chemistry and Physics of Rare Earth Materials,  
College of Chemistry and Chemical Engineering, Inner Mongolia University, Hohhot  
010021, P. R. China.

E-mail: [cezliu@imu.edu.cn](mailto:cezliu@imu.edu.cn).

Fax/Tel: +86–471–4992922

## Contents

### Experimental Section

#### Electrochemical Measurements

**Fig. S1** SEM images of (a)  $(\text{CH}_3)_2\text{NH}_2^+[\text{Cu-BTC}]^-$  and (b)  $\text{Li}^+[\text{Cu-BTC}]^-$ .

**Fig. S2** XRD patterns of  $(\text{CH}_3)_2\text{NH}_2^+[\text{Cu-BTC}]^-$  and  $\text{Li}^+[\text{Cu-BTC}]^-$ .

**Fig. S3** TGA curves of  $(\text{CH}_3)_2\text{NH}_2^+[\text{Cu-BTC}]^-$  and  $\text{Li}^+[\text{Cu-BTC}]^-$  in  $\text{N}_2$  atmosphere.

**Fig. S4** FT-IR spectra of  $(\text{CH}_3)_2\text{NH}_2^+[\text{Cu-BTC}]^-$  and  $\text{Li}^+[\text{Cu-BTC}]^-$ .

**Fig. S5** (a)  $\text{N}_2$  adsorption and desorption isotherms and (b) pore size distribution of  $(\text{CH}_3)_2\text{NH}_2^+[\text{Cu-BTC}]^-$  and  $\text{Li}^+[\text{Cu-BTC}]^-$ .

**Fig. S6** Nyquist plots of (a)  $(\text{CH}_3)_2\text{NH}_2^+[\text{Cu-BTC}]^-$  and (b)  $\text{Li}^+[\text{Cu-BTC}]^-$  at various temperatures.

**Fig. S7** Current-time curve of (a)  $\text{Li}||(\text{CH}_3)_2\text{NH}_2^+[\text{Cu-BTC}]^-||\text{Li}$  cells and (b)  $\text{Li}||\text{Li}^+[\text{Cu-BTC}]^-||\text{Li}$  cells (the inset is EIS before and after polarization).

**Fig. S8** EIS spectra of  $\text{Li}||(\text{CH}_3)_2\text{NH}_2^+[\text{Cu-BTC}]^-||\text{Li}$  and  $\text{Li}||\text{Li}^+[\text{Cu-BTC}]^-||\text{Li}$  cells at  $-20^\circ\text{C}$ .

**Fig. S9** SEM images of Li foil for Li symmetric cells with (a)  $(\text{CH}_3)_2\text{NH}_2^+[\text{Cu-BTC}]^-$ , (b)  $\text{Li}^+[\text{Cu-BTC}]^-$  after 500 h cycles. Schematic diagrams of the Li deposition behavior with (c)  $(\text{CH}_3)_2\text{NH}_2^+[\text{Cu-BTC}]^-$ , (d)  $\text{Li}^+[\text{Cu-BTC}]^-$ .

**Fig. S10** XRD pattern of  $\text{Li}^+[\text{Cu-BTC}]^-$  after galvanostatic charge and discharge cycling.

**Table S1** ICP results of  $\text{Li}^+[\text{Cu-BTC}]^-$ .

**Table S2** Surface area and pore volume of  $(\text{CH}_3)_2\text{NH}_2^+[\text{Cu-BTC}]^-$  and (d)  $\text{Li}^+[\text{Cu-BTC}]^-$ .

**Table S3** Ionic conductivity of  $(\text{CH}_3)_2\text{NH}_2^+[\text{Cu-BTC}]^-$  and (d)  $\text{Li}^+[\text{Cu-BTC}]^-$  at various temperatures.

**Table S4** Summary of ionic conductivity of different solid-state electrolytes in high and low temperatures.

**Table S5** Comparison of the ionic conductivity and  $\text{Li}^+$  transference number of different MOFs-based solid-state electrolytes.

## References

## Experimental Section

### Materials

All chemicals and reagents were used as received without additional purification: copper(II) chloride dihydrate ( $\text{CuCl}_2 \cdot 2\text{H}_2\text{O}$ , 99%), 1,3,5-benzentricarboxylic acid (BTC, 98%), lithium nitrate ( $\text{LiNO}_3$ , 99%), ethanol ( $\geq 99.7\%$ ), methanol ( $\geq 99.5\%$ ) *N,N*-dimethylformamide (DMF,  $\geq 99.5\%$ ), *N,N*-dimethylacetamide (DMA,  $\geq 99.5\%$ ), 1M  $\text{LiPF}_6$  in ethylene carbonate/diethyl carbonate (EC/DEC, 1:1 vol%), isopropyl alcohol ( $\geq 99.7\%$ ), polyvinylidene fluoride (PVDF, 99%), poly(tetrafluoroethylene) (PTFE, 60%), *N*-methyl-2-pyrrolidone (NMP, 98.0%), acetylene black,  $\text{LiFePO}_4$ , CR2032 coin cell components and aluminum foil (Al foil, 99.9%).

### Synthesis

**Synthesis of  $(\text{CH}_3)_2\text{NH}_2^+[\text{Cu-BTC}]^-$ .**<sup>1</sup> The anionic Cu-BTC was synthesized according to a previously reported with minor modification. Typically, 13 mmol  $\text{CuCl}_2 \cdot 2\text{H}_2\text{O}$  and 6.5 mmol BTC were dissolved in a solution of DMA under magnetic stirring. Then the mixture was heated at  $100^\circ\text{C}$  for 48 h. The precipitates were washed with DMF and ethanol, followed by drying at  $80^\circ\text{C}$  for 12 h.

**Synthesis of  $\text{Li}^+[\text{Cu-BTC}]^-$ .** 100 mg  $(\text{CH}_3)_2\text{NH}_2^+[\text{Cu-BTC}]^-$  crystals were dispersed in 20 mL of 0.5 M methanol solution of  $\text{LiNO}_3$  at room temperature. The solution was changed two times per day over three days. The product was washed with fresh methanol several times, and dried at  $80^\circ\text{C}$  for 12 h.

**Preparation of solid-state electrolyte membranes.** MOF powders were homogeneously dispersed in isopropanol and 10% PTFE aqueous solution. After continuous grinding and volatilization of the solvent, the mixture was rolled into electrolyte membranes. The membranes were cut into flexible pieces with a diameter of 16 mm and a thickness of 0.28 mm, and dried at  $80^\circ\text{C}$  overnight. Then the electrolyte membranes were stored in a glove box and soaked in 1 M  $\text{LiPF}_6$  solution for 24 h. The excess liquid electrolyte was wiped with filter paper.

**Preparation of cathode material.** The  $\text{LiFePO}_4$  cathode materials were prepared by coating NMP-based slurry including 80 wt%  $\text{LiFePO}_4$  powders, 10 wt% PVDF and 10% acetylene black onto an aluminum foil. After drying at  $120^\circ\text{C}$  for 8 h, the electrode

film was cut into sheets with a thickness of 200  $\mu\text{m}$  and a diameter of 16 mm. The loading of  $\text{LiFePO}_4$  was about 2–3  $\text{mg cm}^{-2}$ .

### Materials characterization

Powder X-ray diffraction (PXRD) measurement was recorded on an Empyrean PANalytical diffractometer with  $\text{Cu K}\alpha$  radiation ( $\lambda = 1.5406 \text{ \AA}$ ) at 40 mA and 40 kV. Scanning electron microscopy (SEM) images were obtained using a Hitachi S-4800 Scanning electron microscopy. Brunauer-Emmett-Teller surface area and pore structure were determined using Micromeritics ASPS 2460 at 77 K. Thermogravimetric analysis (TGA) was performed on a NETZSCH TG 209F3 with a heating rate of  $10 \text{ }^\circ\text{C min}^{-1}$  under a nitrogen atmosphere. Inductively coupled plasma optical emission spectroscopy (ICP-OES) was measured using an Agilent 720. Fourier-transform infrared spectroscopy (FTIR) spectra were collected by an IRTRACER-100.

### Electrochemical Measurements

Ionic conductivity was measured using electrochemical impedance spectroscopy after placing the solid-state electrolytes between two stainless-steel blocking electrodes ( $\text{SS}|\text{electrolyte}|\text{SS}$ ) in a CR2032 coin cell. The frequency range was from  $10^6$  to 1 Hz with an amplitude of 5 mV, and the measurement temperature range was  $-40^\circ\text{C} \sim 100^\circ\text{C}$ . Ionic conductivity ( $\sigma$ ,  $\text{S cm}^{-1}$ ) was calculated by equation (1):

$$\sigma = \frac{L}{R \times S} \quad (1)$$

where  $L$ ,  $R$  and  $S$  are the thickness, bulk resistance and area of the electrolyte, respectively.

The activation energy ( $E_a$ ) was obtained based on the Arrhenius equation (2):

$$\sigma = A e^{(-E_a/RT)} \quad (2)$$

where  $A$  is the pre-exponential factor, and  $T$  is the Kelvin temperature.

Lithium ions transference number ( $t_{\text{Li}^+}$ ) was measured through AC impedance and potentiostatic polarization measurements using  $\text{Li}|\text{electrolyte}|\text{Li}$  cells. The  $t_{\text{Li}^+}$  was calculated by equation (3):

$$t_{Li^+} = \frac{I_{ss}(\Delta V - I_0 R_0)}{I_0(\Delta V - I_{ss} R_{ss})} \quad (3)$$

where  $\Delta V$  is the polarization voltage (10 mV),  $I_0$  and  $I_{ss}$  are the initial and stable-state currents,  $R_0$  and  $R_{ss}$  are the resistance before and after polarization, respectively.

Electrochemical stability window was obtained by linear sweep voltammetry (LSV) in a Li|electrolyte|SS asymmetric cell with a scan rate of 1 mV s<sup>-1</sup>.

The lithium stripping/plating behavior was carried out by charging and discharging using a Li|electrolyte|Li cell at 0.1 mA cm<sup>-2</sup>. The rate performance was measured using LiFePO<sub>4</sub>|electrolyte|Li cells at 0.1~2.0 C (1 C = 170 mA g<sup>-1</sup>). The cycling ability and charge-discharge capacity were evaluated using LiFePO<sub>4</sub>|electrolyte|Li cells at 0.1 C between 2.5 and 4.2 V on a LANDCT2001A testing system.

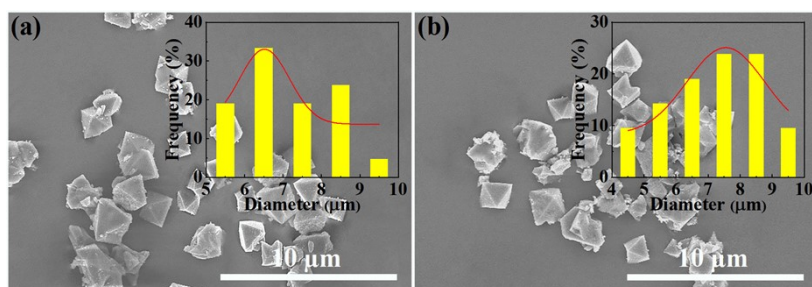

Fig. S1 SEM images of (a)  $(\text{CH}_3)_2\text{NH}_2^+[\text{Cu-BTC}]^-$ , and (b)  $\text{Li}^+[\text{Cu-BTC}]^-$ .

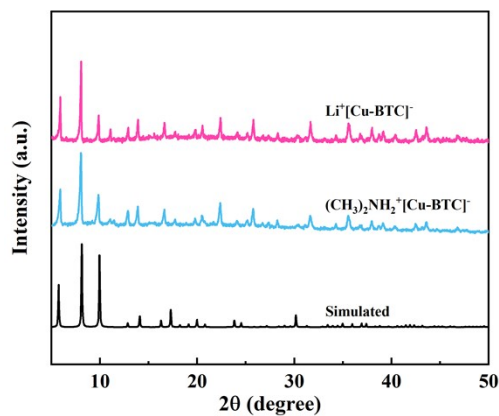

Fig. S2 XRD patterns of  $(\text{CH}_3)_2\text{NH}_2^+[\text{Cu-BTC}]^-$  and  $\text{Li}^+[\text{Cu-BTC}]^-$ .

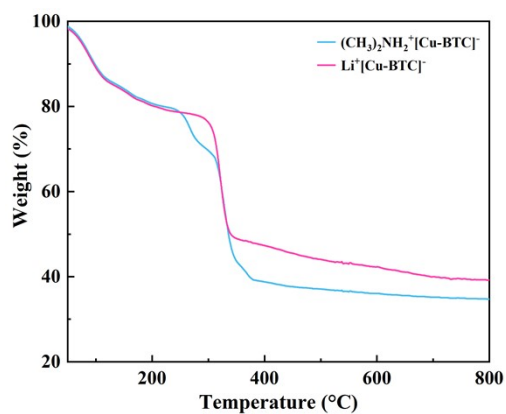

Fig. S3 TGA curves of  $(\text{CH}_3)_2\text{NH}_2^+[\text{Cu-BTC}]^-$  and  $\text{Li}^+[\text{Cu-BTC}]^-$  in  $\text{N}_2$  atmosphere.

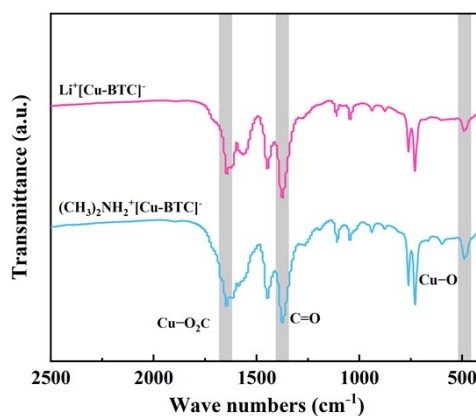

Fig. S4 FT-IR spectra of  $(\text{CH}_3)_2\text{NH}_2^+[\text{Cu-BTC}]^-$  and  $\text{Li}^+[\text{Cu-BTC}]^-$ .

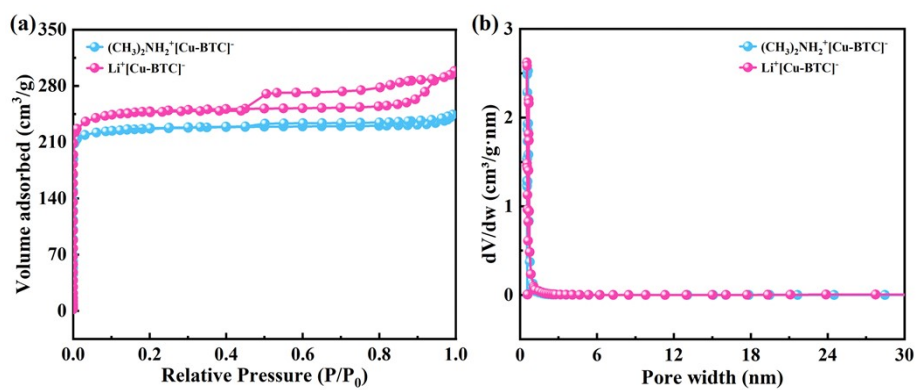

Fig. S5 (a) N<sub>2</sub> adsorption and desorption isotherms and (b) pore size distribution of (CH<sub>3</sub>)<sub>2</sub>NH<sub>2</sub><sup>+</sup>[Cu-BTC]<sup>-</sup> and Li<sup>+</sup>[Cu-BTC]<sup>-</sup>.

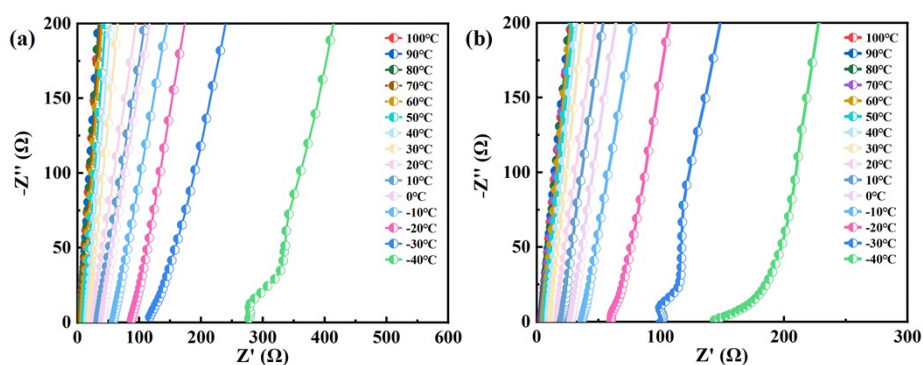

Fig. S6 Nyquist plots of (a) (CH<sub>3</sub>)<sub>2</sub>NH<sub>2</sub><sup>+</sup>[Cu-BTC]<sup>-</sup> and (b) Li<sup>+</sup>[Cu-BTC]<sup>-</sup> at various temperatures.

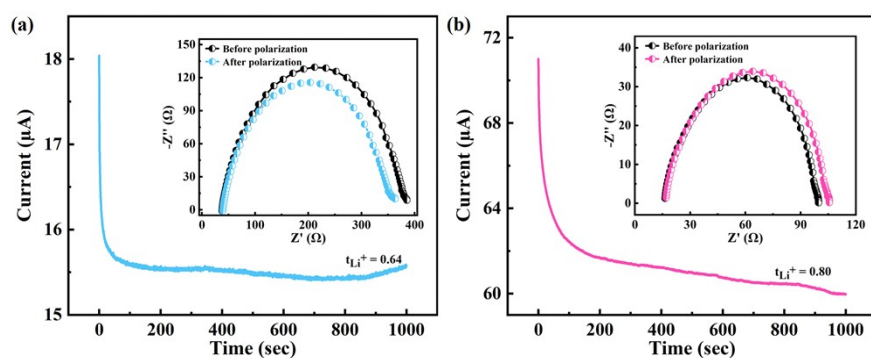

Fig. S7 Current-time curve of (a) Li|(CH<sub>3</sub>)<sub>2</sub>NH<sub>2</sub><sup>+</sup>[Cu-BTC]<sup>-</sup>|Li cells and (b) Li|Li<sup>+</sup>[Cu-BTC]<sup>-</sup>|Li cells (the inset is EIS before and after polarization).

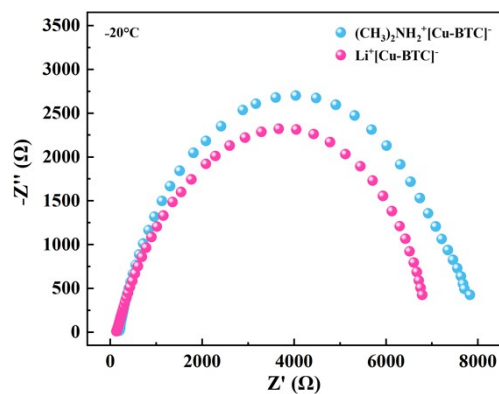

Fig. S8 EIS spectra of  $\text{Li}[(\text{CH}_3)_2\text{NH}_2]^+[\text{Cu-BTC}]^-$  and  $\text{Li}[\text{Li}^+[\text{Cu-BTC}]]^-$  cells at  $-20^\circ\text{C}$ .

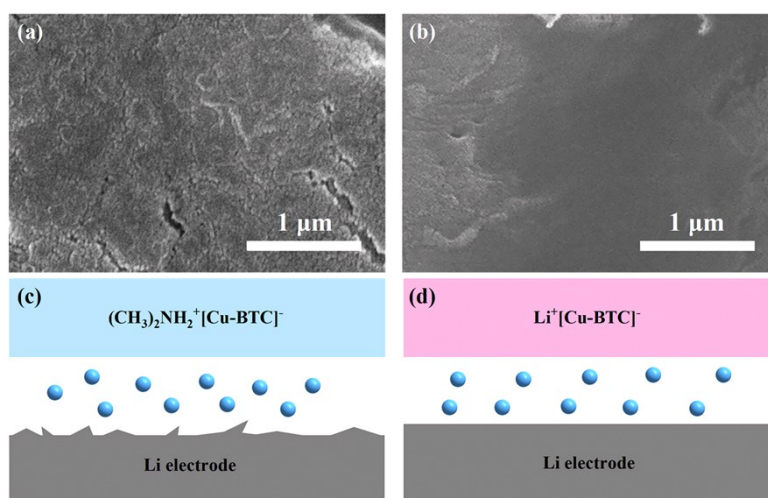

Fig. S9 SEM images of Li foil for Li symmetric cells with (a)  $(\text{CH}_3)_2\text{NH}_2^+[\text{Cu-BTC}]^-$ , (b)  $\text{Li}^+[\text{Cu-BTC}]^-$  after 500 h cycles. Schematic diagrams of the Li deposition behavior with (c)  $(\text{CH}_3)_2\text{NH}_2^+[\text{Cu-BTC}]^-$ , (d)  $\text{Li}^+[\text{Cu-BTC}]^-$ .

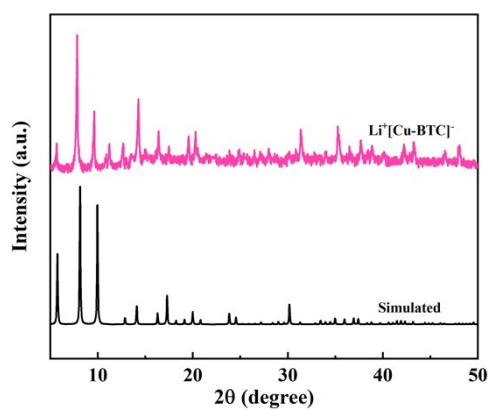

Fig. S10 XRD pattern of  $\text{Li}^+[\text{Cu-BTC}]^-$  after galvanostatic charge and discharge cycling.

Table S1 ICP results of  $\text{Li}^+[\text{Cu-BTC}]^-$ .

| Samples                        | Cu     | Li    | Li/Cu molar ratio |
|--------------------------------|--------|-------|-------------------|
| $\text{Li}^+[\text{Cu-BTC}]^-$ | 16.58% | 0.56% | 0.31              |

Table S2 Surface area and pore volume of  $(\text{CH}_3)_2\text{NH}_2^+[\text{Cu-BTC}]^-$  and  $\text{Li}^+[\text{Cu-BTC}]^-$ .

| Samples                                         | BET surface area<br>( $\text{m}^2 \text{g}^{-1}$ ) | Total pore volume<br>( $\text{cm}^3 \text{g}^{-1}$ ) | Micropore pore size<br>(nm) |
|-------------------------------------------------|----------------------------------------------------|------------------------------------------------------|-----------------------------|
| $(\text{CH}_3)_2\text{NH}_2^+[\text{Cu-BTC}]^-$ | 926.17                                             | 0.306                                                | 0.63                        |
| $\text{Li}^+[\text{Cu-BTC}]^-$                  | 986.45                                             | 0.383                                                | 0.68                        |

Table S3 Ionic conductivity of  $(\text{CH}_3)_2\text{NH}_2^+[\text{Cu-BTC}]^-$  and  $\text{Li}^+[\text{Cu-BTC}]^-$  at various temperatures.

| Temperature ( $^{\circ}\text{C}$ ) | $\sigma$ ( $\text{S cm}^{-1}$ )                 |                                |
|------------------------------------|-------------------------------------------------|--------------------------------|
|                                    | $(\text{CH}_3)_2\text{NH}_2^+[\text{Cu-BTC}]^-$ | $\text{Li}^+[\text{Cu-BTC}]^-$ |
| 100                                | $2.02 \times 10^{-3}$                           | $2.96 \times 10^{-3}$          |
| 90                                 | $1.80 \times 10^{-3}$                           | $2.72 \times 10^{-3}$          |
| 80                                 | $1.57 \times 10^{-3}$                           | $2.45 \times 10^{-3}$          |
| 70                                 | $1.33 \times 10^{-3}$                           | $2.18 \times 10^{-3}$          |
| 60                                 | $1.09 \times 10^{-3}$                           | $1.88 \times 10^{-3}$          |
| 50                                 | $8.62 \times 10^{-4}$                           | $1.58 \times 10^{-3}$          |
| 40                                 | $6.67 \times 10^{-4}$                           | $1.29 \times 10^{-3}$          |
| 30                                 | $5.21 \times 10^{-4}$                           | $1.19 \times 10^{-3}$          |
| 20                                 | $4.16 \times 10^{-4}$                           | $1.12 \times 10^{-3}$          |
| 10                                 | $3.24 \times 10^{-4}$                           | $6.25 \times 10^{-4}$          |
| 0                                  | $2.68 \times 10^{-4}$                           | $4.55 \times 10^{-4}$          |
| -10                                | $1.80 \times 10^{-4}$                           | $3.41 \times 10^{-4}$          |
| -20                                | $1.17 \times 10^{-4}$                           | $2.05 \times 10^{-4}$          |
| -30                                | $8.04 \times 10^{-5}$                           | $1.23 \times 10^{-4}$          |
| -40                                | $3.88 \times 10^{-5}$                           | $1.10 \times 10^{-4}$          |

Table S4 Summary of ionic conductivity of different solid-state electrolytes in high and low temperatures.

| Materials                             | $\sigma$ (S cm <sup>-1</sup> ) | Temperature (°C) | Ref.      |
|---------------------------------------|--------------------------------|------------------|-----------|
| PESF-LLZTO CPEs                       | 9.42×10 <sup>-4</sup>          | 80               | S2        |
|                                       | 1.49×10 <sup>-4</sup>          | -10              |           |
| 1,3,5-trioxane-based polymer          | 2.20×10 <sup>-4</sup>          | -20              | S3        |
| Hollow ZIF-8                          | 1.97×10 <sup>-3</sup>          | 100              | S4        |
|                                       | 2.46×10 <sup>-4</sup>          | -20              |           |
| ZIF-67@ZIF-8                          | 4.89×10 <sup>-3</sup>          | 100              | S5        |
|                                       | 3.44×10 <sup>-4</sup>          | -20              |           |
| MOF-525                               | 4.90×10 <sup>-3</sup>          | 100              | S6        |
|                                       | 2.2×10 <sup>-5</sup>           | -20              |           |
| BStSi                                 | 2.20×10 <sup>-3</sup>          | 100              | S7        |
|                                       | 3.10×10 <sup>-5</sup>          | -20              |           |
| NUST-23                               | 1.36×10 <sup>-3</sup>          | 80               | S8        |
|                                       | 9.74×10 <sup>-7</sup>          | -40              |           |
| SE-PMOF                               | 3.31×10 <sup>-3</sup>          | 60               | S9        |
|                                       | 1.62×10 <sup>-4</sup>          | -20              |           |
| LCMOF-1                               | 1.43×10 <sup>-3</sup>          | 60               | S10       |
|                                       | 3.45×10 <sup>-5</sup>          | -20              |           |
| TPB-DMTP-COF                          | 2.10×10 <sup>-5</sup>          | -30              | S11       |
| LiCON-3                               | 1.17×10 <sup>-4</sup>          | 100              | S12       |
|                                       | 0.90×10 <sup>-5</sup>          | -40              |           |
| Li <sup>+</sup> [Cu-BTC] <sup>-</sup> | 2.96×10 <sup>-3</sup>          | 100              | This work |
|                                       | 1.10×10 <sup>-4</sup>          | -40              |           |

Table S5 Comparison of the ionic conductivity and  $\text{Li}^+$  transference number of different MOFs-based solid-state electrolytes.

| Materials                      | $\sigma$ ( $\text{S cm}^{-1}$ ) | $t_{\text{Li}^+}$ | Ref.      |
|--------------------------------|---------------------------------|-------------------|-----------|
| UiO-66- $\text{NH}_2$ @67      | $9.73 \times 10^{-5}$           | 0.67              | S13       |
| MOF-BZN                        | $8.76 \times 10^{-4}$           | 0.75              | S14       |
| MOF-SN-FEC                     | $7.04 \times 10^{-4}$           | 0.68              | S15       |
| Zr-MA-Li                       | $6.62 \times 10^{-4}$           | 0.63              | S16       |
| SIL/UiO-66                     | $2.20 \times 10^{-4}$           | 0.35              | S17       |
| Al-MOF                         | $2.00 \times 10^{-4}$           | 0.84              | S18       |
| SN-ZIF-69                      | $1.37 \times 10^{-4}$           | 0.67              | S19       |
| Li-IL@MOF                      | $3.43 \times 10^{-4}$           | 0.29              | S20       |
| Hollow UiO-66                  | $1.15 \times 10^{-3}$           | 0.70              | S21       |
| Li-Cuboct-H                    | $1.02 \times 10^{-3}$           | 0.56              | S22       |
| $\text{Li}^+[\text{Cu-BTC}]^-$ | $1.16 \times 10^{-3}$           | 0.80              | This work |

## References

1. Y.X. Tan, Y.P. He and J. Zhang, *Chem. Commun.*, 2011, **47**, 10647–10649.
2. J. Sun, M. Tian, H. Dong, Z. Lu, L. Peng, Y. Rong, R. Yang, J. Shu and C. Jin, *Appl. Mater. Today*, 2022, **27**, 101447.
3. Z. Li, R. Yu, S. Weng, Q. Zhang, X. Wang and X. Guo, *Nat. Commun.*, 2023, **14**, 482.
4. L. Tian, Z. Liu, F. Tao, M. Liu and Z. Liu, *Dalton Trans.*, 2021, **50**, 13877–13882.
5. Z. Liu, P. Liu, L. Tian, J. Xiao, R. Cui and Z. Liu, *Chem. Commun.*, 2020, **56**, 14629–14632.
6. Z. Wang, R. Tan, H. Wang, L. Yang, J. Hu, H. Chen and F. Pan, *Adv. Mater.*, 2017, **30**, 1704436.
7. Z. Lin and J. Liu, *RSC Adv.*, 2019, **9**, 34601–34606.
8. Y. Xuan, Y. Wang, B. He, S. Bian, J. Liu, B. Xu and G. Zhang, *Chem. Mater.*, 2022, **34**, 9104–9110.
9. Q. Zhang, B. Liu, J. Wang, Q. Li, D. Li, S. Guo, Y. Xiao, Q. Zeng, W. He, M. Zheng, Y. Ma and S. Huang, *ACS Energy Lett.*, 2020, **5**, 2919–2926.
10. Q. Zhang, D. Li, J. Wang, S. Guo, W. Zhang, D. Chen, Q. Li, X. Rui, L. Gan and S. Huang, *Nanoscale*, 2020, **12**, 6976–6982.
11. J. Wang, L. Liu, Y. Liu, X. M. Zhang and J. Li, *Small*, 2023, **19**, 2207831.
12. X. Li, Q. Hou, W. Huang, H.-S. Xu, X. Wang, W. Yu, R. Li, K. Zhang, L. Wang, Z. Chen, K. Xie and K. P. Loh, *ACS Energy Lett.*, 2020, **5**, 3498–3506.
13. Q. Zhang, S. Wang, Y. Liu, M. Wang, R. Chen, Z. Zhu, X. Qiu, S. Xu and T. Wei, *Energy Technol.*, 2023, **11**, 2201438.
14. Y. Ouyang, W. Gong, Q. Zhang, J. Wang, S. J. Guo, Y. B. Xiao, D. X. Li, C. H. Wang, X. L. Sun, C. Y. Wang and S. M. Huang, *Adv. Mater.*, 2023, **35**, 2304685.
15. D. D. Han, P. F. Wang, P. Li, J. Shi, J. Liu, P. J. Chen, L. P. Zhai, L. W. Mi and Y. Z. Fu, *ACS Appl. Mater. Inter.*, 2021, **13**, 52688–52696.
16. Q. Zhang, Y. Xiao, Q. Li, J. Wang, S. Guo, X. Li, Y. Ouyang, Q. Zeng, W. He and S. Huang, *Dalton Trans.*, 2021, **50**, 2928–2935.
17. Z. Liu, Z. Hu, X. Jiang, X. Wang, Z. Li, Z. Chen, Y. Zhang and S. Zhang, *Small*, 2022, **18**, 2203011.
18. W.X. Liu, X.C. Huang, Y. Meng, D. Xiao and Y. Guo, *J. Mater. Chem. A*, 2023, **11**, 13446–13458.
19. X. Zhu, Z. Chang, H. Yang, P. He and H. Zhou, *J. Mater. Chem. A*, 2022, **10**, 651–663.
20. Z. Wu, Y. Yi, F. Hai, X. Tian, S. Zheng, J. Guo, W. Tang, W. Hua and M. Li, *ACS Appl. Mater. Inter.*, 2023, **15**, 22065–22074.
21. Z. X. Liu, W. Z. Chen, F. L. Zhang, F. Wu, R. J. Chen and L. Li, *Small*, 2023, **19**, 2206655.
22. H. L. Liu, H. G. Pan, M. Yan, X. Zhang and Y. Z. Jiang, *Adv. Mater.*, 2023, **35**, 2300888.
